# Supplementary material
Source: publisher site journal article supplement (https://www.dovepress.com/get_supplementary_file.php?f=444718.docx)
Supplement: Supplementary file 1 [file get_supplementary_file.php]

Appendix

## Appendix 1. Thesaurus terms categorized per database. (Web of Science is not included due to them not using thesaures/MeSH terms.)

| *Pubmed* | *Embase* | *PsycINFO* | *CINAHL* | *Cochrane* |
| --- | --- | --- | --- | --- |
| Concept 1: **Sexual Abuse** | | | | | |
| “Sex offenses”[Mesh]  “Child Abuse, Sexual”[Mesh]  “Sexual Harassment”[Mesh]  “Sexual Trauma”[Mesh]  “Adult Survivors of Child Abuse”[Mesh] | exp Sexual Crime/  exp Sexual Violence/  exp Sexual Trauma/  exp Sexual Misconduct/  Childhood Sexual Abuse Survivor/ | exp Sex Offenses/  exp Sexual Harassment/ | (MH "Sexual Abuse+")  (MW "Sexual Trauma")  (MW "Sexual Harassment")  (MH “Child Abuse Survivors”) | [mh “Sex Offenses”]  [mh “Sexual Harassment”]  [mh “Sexual Trauma”]  [mh Rape]  [mh “Child Abuse, Sexual”] |
| Concept 2: **Health Care Personnel** | | | | | |
| “General Practitioners”[Mesh]  “Health personnel”[Mesh]  “Physicians”[Mesh]  “Physician assistants”[Mesh] | exp Medical Personnel/  Clinician/  exp Paramedical Personnel/ | exp Health Personnel/  exp Clinicians/ | (MH "Health Personnel+") | [mh “Health Personnel”]  [mh “General Practitioners”]  [mh Physicians]  [mh “Physician assistants”] |
| Concept 3: **Training Methods** | | | | | |
| “Education”[Mesh]  "Education" [Subheading]  “Curriculum”[Mesh]  “Inservice training”[Mesh]  “Learning”[Mesh]  “Role Playing”[Mesh]  “Electronic Supplementary Materials”[Publication Type] | exp Education/  exp Learning/  Workshop/  Role Play/ | exp Education/  exp Clinical Methods Training/  Communication Skills Training/  exp Personnel Training/  exp Learning/  Role Playing/ | (MH "Education+")  (MH "Learning+")  (MH “Role Playing”) | [mh Education]  [mh Curriculum]  [mh "Inservice training”]  [mh Learning]  [mh “Electronic Supplementary Material”]  [mh “Role Playing”] |

## Appendix 2. Keyterms and phrases, these will be added in every search per database.

| *Keyterms & Phrases* | | | |
| --- | --- | --- | --- |
| Concept 1: **Sexual Abuse** | Concept 2: **Health Care Personnel** | Concept 3: **Training Methods** |
| Rape  Sex Offense*  Sex Offence*  Sexual Assault*  Sexual Violen*  Sexual Abus*  Sexual Trauma*  Molestation  Sexual Harassment*  Sex Crime*  Sexual Crime*  Sexual Misconduct*  Sexual Exploitation  Sexual Coercion  Sex Trafficking | Health Care Personnel  Medical Personnel  General Practitioner*  GP  GPs  Physician*  Health Care Provider*  Health Occupations*  Health Personnel  Doctor*  Clinician*  Medic  Family Medicine  Medical Practitioner*  Medical Assistant*  Medical Student*  Nurse*  Paramedical Personnel  Paramedical Staff  Paramedical Professional  Allied Health Professional* | Workshop*  Curricul*  Education*  Program*  Course*  Podcast  Learning  Screen*  Preceptorship  Training  Role play*  Workshop*  Accreditation*  Trauma-Informed Care  Instructional  Tutorial*  Webcast*  Teach* |

## Appendix 3. *Data charting template.*

## **PREVIEW**

# General information

**Title**

Title of paper / abstract / report that data are extracted from

**Author**

**Year of publication**

**Country in which the study conducted**

United States

1. England
2. Canada
3. Australia
4. New Zealand
5. Other

**Aim of study**

**Endpoints**

# Characteristics of included studies

## Methods

**Study design**

1. Randomised controlled trial
2. Non-randomised study
3. Other

## Participants

**Population description**

**Baseline characteristics of participants**

**Total number of participants**

## Intervention

**Intervention description**

# Outcomes

**Outcomes (key findings)**
